# Supplementary material
Source: Springer Nature journal article supplement (https://www.springermedizin.de/resource/supplementary/12936_2013_2933_MOESM2_ESM.pdf/9544652)
Supplement: MOESM2 [file 9544652]

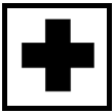

Passive case  
detection at the  
health facility  
*N=110 cases*

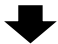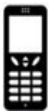

Notify district focal  
point

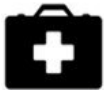

Deploy  
investigation team  
within 3 days:

- District supervisor
- Health facility nurse
- Community health workers

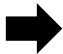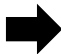

Visit 5 nearest neighbor  
compounds  
Interview, test all individuals,  
treat positive cases

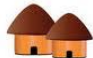

Neighbor

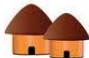

Index

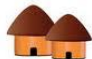

Neighbor

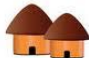

Neighbor

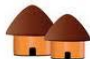

Neighbor

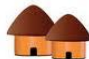

Neighbor

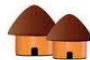

Facility  
nurse  
revisits all  
compounds  
after 1 week  
to screen  
for fever,  
test, and  
treat

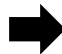

*N=5,497 RDT-negative family and neighbors*

*N=23 RDT-positive secondary cases*
